# Supplementary material
Source: PubMed Central journal article supplement (PMC3296889)
Supplement: NIHMS353150-supplement-01.pdf [file NIHMS353150-supplement-01.pdf]

*Supplemental Table 1: Summary of antibodies used in the present study*

| <b>Protein</b>                         | <b>Company</b>              | <b>Location</b>       | <b>Dilution</b>      | <b>Expected MW</b>  | <b>Method</b> |
|----------------------------------------|-----------------------------|-----------------------|----------------------|---------------------|---------------|
| Robo1                                  | Abcam                       | Cambridge, MA         | 1:500                | 181kDa              | WB            |
| Robo4                                  | Abcam                       | Cambridge, MA         | 1:2000               | 171kDa              | WB            |
| Tie2/TEK                               | Upstate                     | New York              | 1:5000               | 145kDa              | WB            |
| Annexin A1                             | Cell Signaling Technologies | Danvers, MA           | 1:3000               | 37kDa               | WB            |
| ERG-1/2/3                              | Santa Cruz                  | Santa Cruz, CA        | 1:200                | 55kDa, 49kDa, 38kDa | WB            |
| Neuropilin 1                           | Santa Cruz                  | Santa Cruz, CA        | 1:100                | 130kDa              | WB            |
| VEGF R1                                | Santa Cruz                  | Santa Cruz, CA        | 1:200                | 180kDa              | WB            |
| VEGF R2                                | Santa Cruz                  | Santa Cruz, CA        | 1:200                | 150kDa              | WB            |
| Myocardin                              | Abcam                       | Cambridge, MA         | 1:1000               | 101kDa              | WB            |
| VCAM-1                                 | Santa Cruz                  | Santa Cruz, CA        | 1:500                | 110kDa              | WB            |
| VE-Cad                                 | Cell Signaling Technologies | Danvers, MA           | 1:1000               | 130kDa              | WB and IHC    |
| Fibulin 2                              | Santa Cruz                  | Santa Cruz, CA        | 1:1000               | 195kDa              | WB            |
| $\beta$ -actin                         | Sigma                       | Saint Louis, MO       | 1:5000               | 42kDa               | WB            |
| Myocilin                               | Stamer Lab                  | Tucson, AZ            | 1:3000               | 55/57kDa            | WB and IHC    |
| eNOS                                   | Santa Cruz                  | Santa Cruz, CA        | 1:200                | 140kDa              | WB            |
| Integrin $\alpha$ 6 (J1B5)             | Dr. Anne Cress              | University of Arizona | 1 $\mu$ g for the IP | 120kDa              | IP            |
| Integrin $\alpha$ 3/ $\alpha$ 6 (AA6A) | Dr. Anne Cress              | University of Arizona | 1:10,000             | 120/70kDa           | WB and IHC    |

WB: western blot; IHC: immunohistochemistry; IP: immunoprecipitation
